# Supplementary material
Source: PubMed Central journal article supplement (PMC3397390)
Supplement: NIHMS386256-supplement-supplemental_tables.pdf [file NIHMS386256-supplement-supplemental_tables.pdf]

Supplemental material for: Engelmann, KA, Jordan LC, Outcome Measures Used in Pediatric Stroke Studies: A Systematic Review; Arch Neurol 2011;69(1): 23-27.

-

Supplemental Table 1. Summary of Included Pediatric Stroke Studies

Supplemental Table 2. Outcome Measures in Pediatric Stroke Studies, Expanded Version

**Supplemental Table 1. Summary of Included Pediatric Stroke Studies**

| Study Author /Year               | Primary Study Goals                                                                                                                                                                                 | Total N (N in f/u, N f/u not available, N deaths,) | Age at Stroke Onset                                         | Stroke Type                                                                                                   | Outcome Measures                                                                                                                                                                                                                                                                                                                                                                                                                                                                                                         |
|----------------------------------|-----------------------------------------------------------------------------------------------------------------------------------------------------------------------------------------------------|----------------------------------------------------|-------------------------------------------------------------|---------------------------------------------------------------------------------------------------------------|--------------------------------------------------------------------------------------------------------------------------------------------------------------------------------------------------------------------------------------------------------------------------------------------------------------------------------------------------------------------------------------------------------------------------------------------------------------------------------------------------------------------------|
| Beslow <sup>1</sup><br>2010      | Describe features of children with Intracerebral Hemorrhage (ICH); Determine predictors of short-term outcome                                                                                       | 22 (21, 0, 1)                                      | 4.2-16.6 years                                              | Intracerebral Hemorrhage (ICH)                                                                                | <ul style="list-style-type: none"> <li>• Pediatric Stroke Outcome Measure (PSOM)</li> <li>• King's Outcome Scale for Childhood Head Injury (KOSCHI)</li> </ul>                                                                                                                                                                                                                                                                                                                                                           |
| Block <sup>2</sup><br>1999       | Directly measure attention, memory, and language in order to evaluate empirically the severity and laterality of sequelae                                                                           | 11 (11, 0, 0)                                      | 6 mo – 15 years                                             | Unilateral non-hemorrhagic strokes                                                                            | <ul style="list-style-type: none"> <li>• Neuropsychological Battery*</li> </ul>                                                                                                                                                                                                                                                                                                                                                                                                                                          |
| Brouwer<br>2010 <sup>3</sup>     | In a hospital-based population admitted to a level 3 NICU, describe clinical and neuroimaging data in the neonatal period and relate imaging finding to outcome                                     | 53 (37, 3, 13)                                     | Full-term neonates                                          | ICH                                                                                                           | <ul style="list-style-type: none"> <li>• Griffiths Mental Developmental Scales (GMDS)</li> </ul>                                                                                                                                                                                                                                                                                                                                                                                                                         |
| Christerson<br>2010 <sup>4</sup> | In a population-based cohort of childhood stroke, evaluate long-term outcome with respect to neurological outcome, school performance, activities of daily life, and health-related quality of life | 51 (46, 1, 4)                                      | Onset age range n/a. Inclusion criteria: 28 days – 18 years | Arterial Ischemic Stroke (AIS), Cerebral Sinus Venous Thrombosis (CSVT), and non-traumatic hemorrhagic stroke | <ul style="list-style-type: none"> <li>• International Classification of Functioning Disability and Health (ICF-CY)</li> <li>• Child Health Questionnaire (CHQ)</li> <li>• Short-Form General Health Survey (SF-36)</li> </ul>                                                                                                                                                                                                                                                                                           |
| Cnossen<br>2010 <sup>5</sup>     | Study functional outcome in children after pediatric AIS and identify risk factors influencing quality of life                                                                                      | 76 (66, 2, 8)                                      | 1 mo – 17 years                                             | AIS                                                                                                           | <ul style="list-style-type: none"> <li>• Non-standard mRS (1-4)</li> <li>TAPQOL, TACQOL-PF, TACQOL-CF, and TAAQOL from TNO-AZL<sup>1</sup></li> </ul>                                                                                                                                                                                                                                                                                                                                                                    |
| De Schryver<br>2000 <sup>6</sup> | Gather data regarding the physical sequelae, cognitive function, and quality of life in children who have experienced ischemic stroke                                                               | 37 (27, 6, 4)                                      | 3 mo – 14 years                                             | Ischemic                                                                                                      | <ul style="list-style-type: none"> <li>• International Classification of Impairments, Disabilities, and Handicaps</li> <li>• Modified Rankin Scale (mRS)</li> <li>• Coloured and Standard Progressive Matrices</li> <li>• Wechsler Intelligence Scale for Children – Revised, Dutch version (WISC-RN)</li> <li>• Wechsler Intelligence Scale for Adults (WAIS)</li> <li>• Adapted Card-Sorting Task for Children</li> <li>• Denver Developmental Screening Tests II</li> <li>• Nonstandard QOL questionnaires</li> </ul> |
| Delsing<br>2001 <sup>7</sup>     | Identify early prognostic factors in children with AIS                                                                                                                                              | 31 (27, 0, 4)                                      | 2 mo – 14.3 years                                           | AIS                                                                                                           | <ul style="list-style-type: none"> <li>• Residual impairment measure combining mRS (1-4) and school performance</li> </ul>                                                                                                                                                                                                                                                                                                                                                                                               |

|                                                 |                                                                                                                                                                                                     |                             |                                   |                                                      |                                                                                                                                                                                                                                                                                                                          |
|-------------------------------------------------|-----------------------------------------------------------------------------------------------------------------------------------------------------------------------------------------------------|-----------------------------|-----------------------------------|------------------------------------------------------|--------------------------------------------------------------------------------------------------------------------------------------------------------------------------------------------------------------------------------------------------------------------------------------------------------------------------|
| deVeber <sup>‡</sup><br>2000 <sup>8</sup>       | Define the immediate and long-term predictors of neurologic outcome in children surviving ischemic stroke                                                                                           | 163 (163, 0, 0)             | 0 – 17.8 years                    | Ischemic: AIS, CSVT, or both                         | <ul style="list-style-type: none"> <li>• PSOM</li> <li>• Two questions modified from the Euroqual measure</li> </ul>                                                                                                                                                                                                     |
| Domi <sup>‡</sup><br>2008 <sup>9</sup>          | Define frequency, predictors, and outcomes of stroke associated with cardiac surgery in children with congenital heart disease                                                                      | 30 (25, 1, 4)               | Mean age: 4.1 years               | AIS and CSVT                                         | <ul style="list-style-type: none"> <li>• PSOM</li> </ul>                                                                                                                                                                                                                                                                 |
| Everts<br>2008 <sup>10</sup>                    | Assess cognitive functioning, motor outcome, behavior, and quality of life after childhood stroke; study the relationship between variables influencing rehabilitation and outcome                  | 21 (21, 0, 0)               | 0.1-17.6 years                    | “Stroke”: Stroke type not specified                  | <ul style="list-style-type: none"> <li>• Neuropsychological battery<sup>§</sup></li> </ul>                                                                                                                                                                                                                               |
| Friefeld <sup>‡</sup><br>2004 <sup>11</sup>     | Examine parent and child perspectives on quality of life, and factors that correlate with reduced QOL for child survivors of stroke                                                                 | 100 (100, 0, 0)             | 2-18 years                        | Ischemic: AIS and CSVT                               | <ul style="list-style-type: none"> <li>• Pediatric Quality of Life Inventory (PedsQL)</li> <li>• PSOM</li> </ul>                                                                                                                                                                                                         |
| Ganesan<br>2000 <sup>12</sup>                   | Investigate outcome for children with ischemic stroke                                                                                                                                               | 128 (90, 23, 15)            | 3 mo – 16 years                   | Ischemic                                             | <ul style="list-style-type: none"> <li>• Nonstandard parental questionnaire</li> <li>• Bayley Scales of Infant Development (BSID-II)</li> <li>• WISC, WAIS, Wechsler Preschool and Primary Scale of Intelligence (WPPSI)</li> <li>• Clinical Evaluation of Language Fundamentals, Revised and Preschool Forms</li> </ul> |
| Gordon<br>2002 <sup>13</sup>                    | Describe the functional consequences of childhood stroke in terms of activity limitation; explore the relationship between extent of brain damage, impairment, and functional sequelae              | 17 (17, 0, 0)               | 14 mo – 13.5 years                | Ischemic                                             | <ul style="list-style-type: none"> <li>• Pediatric Stroke Activity Limitation Measure (PSALM)</li> <li>• Child Health Questionnaire (CHQ)</li> <li>• PSOM</li> <li>• Short-Form 36 General Health Survey (SF-36)</li> </ul>                                                                                              |
| Hariman<br>1991 <sup>14</sup>                   | Evaluate retrospectively the functional status of 14 Sickle-Cell Disease (SCD) children with strokes; compare SCD children with age-matched and gender-matched SCD children who had not had strokes | 14 (14, 0, 0)               | 5 – 18 years                      | “Stroke”: Stroke type not specified                  | <ul style="list-style-type: none"> <li>• Modified Motor Assessment Scale (MAS)</li> <li>• Barthel Index</li> <li>• WISC-R</li> <li>• California Test of Personality (CTP)</li> <li>• Test of Language Development (TOLD)</li> </ul>                                                                                      |
| Hetherington <sup>‡</sup><br>2005 <sup>15</sup> | Address the differential effects of arterial ischemic stroke and sinovenous thrombosis on short-term cognitive outcome                                                                              | 72 (72, 0, 0)               | Mean age for AIS = 4.9; CSVT= 4.2 | Ischemic: AIS and CSVT                               | <ul style="list-style-type: none"> <li>• BSID-II</li> <li>• WISC, WAIS, WPPSI</li> </ul>                                                                                                                                                                                                                                 |
| Hurvitz<br>2004 <sup>16</sup>                   | Examine the long-term functional, psychosocial, and medical outcome of pediatric stroke survivors.                                                                                                  | 50 (29, 18, 3)              | 8 mo – 17.7 years                 | All, except due to trauma, CP, nonacute, nonvascular | <ul style="list-style-type: none"> <li>• Vineland Adaptive Behavior Scales (VABS)</li> <li>• Diener Satisfaction with Life Scale</li> </ul>                                                                                                                                                                              |
| Jordan                                          | Obtain data regarding the association                                                                                                                                                               | 30 (30, 0, 5) <sup>  </sup> | 0–16 years                        | ICH                                                  | <ul style="list-style-type: none"> <li>• Glasgow Outcome Scale (GOS)</li> </ul>                                                                                                                                                                                                                                          |

|                                          |                                                                                                                                                                                                                 |                                         |                                     |                                                                                                                                                      |                                                                                                                                                                                                                 |
|------------------------------------------|-----------------------------------------------------------------------------------------------------------------------------------------------------------------------------------------------------------------|-----------------------------------------|-------------------------------------|------------------------------------------------------------------------------------------------------------------------------------------------------|-----------------------------------------------------------------------------------------------------------------------------------------------------------------------------------------------------------------|
| 2009 <sup>17</sup>                       | between intracerebral hemorrhage (ICH) volume/location and outcome in children.                                                                                                                                 |                                         |                                     |                                                                                                                                                      |                                                                                                                                                                                                                 |
| Kim 2009 <sup>18</sup>                   | Investigate recovery patterns and potential prognostic factors of pediatric stroke                                                                                                                              | 44 (44, 0, 0)                           | 8 mo – 17 years                     | All except venous, neonatal, recurrent, traumatic, or anoxic brain injury                                                                            | <ul style="list-style-type: none"> <li>• Modified Brunnstrom stages</li> <li>• Gross Motor Function Classification System</li> <li>• Activities of daily living (ADLs)</li> </ul>                               |
| Kumar 2009 <sup>19</sup>                 | Analyze the etiology, clinical features, treatment options, and outcome assessment in children with spontaneous ICH                                                                                             | 50 (50, 0, 3) <sup>  </sup>             | 2 mo – 17 years                     | ICH                                                                                                                                                  | <ul style="list-style-type: none"> <li>• GOS</li> </ul>                                                                                                                                                         |
| Lansing <sup>¶</sup> 2004 <sup>20</sup>  | Characterize verbal and learning memory (VLM) following pediatric stroke; compare VLM profiles of stroke subjects with right vs. left hemisphere lesions and early (< 12 months) vs. late (> 12 months) strokes | 10 in the late stroke group: (10, 0, 0) | 3 – 13 years (late group)           | All except neonatal bleeds potentially associated with prematurity, neonatal watershed infarcts associated with hypoxia, other precipitating factors | <ul style="list-style-type: none"> <li>• WISC-III</li> <li>• California Verbal Learning Test – Children’s Version (CVLT-C)</li> </ul>                                                                           |
| Lo 2008 <sup>21</sup>                    | Determine whether the risk factors for ICH have changed compared with those in earlier published series; estimate the residual deficits in the survivors                                                        | 85 (48, 8, 29)                          | 7 days – 17 years                   | ICH                                                                                                                                                  | <ul style="list-style-type: none"> <li>• Modification of the PSOM</li> </ul>                                                                                                                                    |
| Max <sup>¶</sup> 2004 <sup>22</sup>      | Investigate attentional outcome after childhood stroke                                                                                                                                                          | 12 in the late stroke group: (12, 0, 0) | 7.8±3.2 years (late group)          | All except neonatal bleeds potentially associated with prematurity, neonatal watershed infarcts associated with hypoxia, other precipitating factors | <ul style="list-style-type: none"> <li>• Starry Night</li> <li>• Neurological exam</li> <li>• WISC-III</li> </ul>                                                                                               |
| Max <sup>¶</sup> 2010 <sup>23</sup>      | Investigate brain plasticity and vulnerability through the study of the relationship of age at the time of brain injury and neurocognitive and psychiatric outcome                                              | 12 in the late stroke group: (12, 0, 0) | 7.8±3.2 years (late group)          | All except neonatal bleeds potentially associated with prematurity, neonatal watershed infarcts associated with hypoxia, other precipitating factors | <ul style="list-style-type: none"> <li>• A battery of neuropsychological tests<sup>#</sup> covering the following intellectual, academic, linguistic, visuospatial, memory, and executive functions.</li> </ul> |
| McLinden <sup>‡</sup> 2007 <sup>24</sup> | Assess the cognitive development of children with nonhemorrhagic neonatal stroke.                                                                                                                               | 27 (27, 0, 0)                           | Neonates. No range or median given. | Ischemic: AIS and CSVT                                                                                                                               | <ul style="list-style-type: none"> <li>• BSID – edition not specified</li> </ul>                                                                                                                                |

|                             |                                                                                                                                                                                                                                             |                |                   |                                                                         |                                                                                                                                                                                                                                                                                                       |
|-----------------------------|---------------------------------------------------------------------------------------------------------------------------------------------------------------------------------------------------------------------------------------------|----------------|-------------------|-------------------------------------------------------------------------|-------------------------------------------------------------------------------------------------------------------------------------------------------------------------------------------------------------------------------------------------------------------------------------------------------|
| Mercuri 2001 <sup>25</sup>  | Evaluate the occurrence of prothrombotic disorders in a cohort of infants with neonatal stroke; document any association of prothrombotic disorders with the type of infarct seen on magnetic resonance imaging (MRI) and clinical outcome. | 24 (24, 0, 0)  | Neonates          | Cerebral Infarction                                                     | <ul style="list-style-type: none"> <li>• Structured neurologic examination</li> <li>• Griffiths Developmental Scales</li> </ul>                                                                                                                                                                       |
| Mercuri 2004 <sup>26</sup>  | Assess neuromotor function at school age in children who had cerebral infarction on neonatal magnetic resonance imaging (MRI)                                                                                                               | 24 (22, 2, 0)  | Neonates          | Cerebral Infarction                                                     | <ul style="list-style-type: none"> <li>• Early: Structured neurologic examination for infants, Griffiths Neurodevelopmental scales</li> <li>• School Age: Touwen's Examination of the Child with Minor Neurologic Dysfunction, Movement Assessment Battery for Children (Mov ABC), WPPSI-R</li> </ul> |
| Pavlovic 2006 <sup>27</sup> | Obtain information about neurological and cognitive outcome for a population-based group of children after pediatric ischemic stroke                                                                                                        | 48 (33, 11, 4) | 0.9-16.3 years    | Ischemic: AIS and CSVT                                                  | <ul style="list-style-type: none"> <li>• Nonstandard questionnaire</li> <li>• Detailed neurological examination</li> <li>• BSID-II, K-ABC, HAWIK-III, HAWIE-R**</li> </ul>                                                                                                                            |
| Ricci 2008 <sup>28</sup>    | Assess cognitive outcome at early school age in term-born children with MCA territory infarction of perinatal onset; examine the correlation between cognitive abilities and lesions as seen on neonatal MRI, epilepsy, and hemiplegia.     | 31 (28, 2, 1)  | 5.33-10.33 years  | Middle Cerebral Artery (MCA) territory infarctions acquired perinatally | <ul style="list-style-type: none"> <li>• WIPPSI-R</li> <li>• WISC-III</li> <li>• Standardized neurological examination at early school age</li> </ul>                                                                                                                                                 |
| Salih 2006 <sup>29</sup>    | Report on the prognosis, neurologic outcome, and recurrences of stroke in Saudi children.                                                                                                                                                   | 104 (90, 9, 5) | 1 mo – 12 years   | "Pediatric Stroke": Stroke type not specified                           | <ul style="list-style-type: none"> <li>• Denver Developmental Screening Test</li> <li>• VABS</li> <li>• Stanford-Binet Intelligence Scale</li> <li>• WISC- edition unspecified</li> </ul>                                                                                                             |
| Sreenan 2000 <sup>30</sup>  | Evaluate long-term outcome of CT-documented cerebral infarction in term neonates to ascertain factors predicting risk of subsequent neurodevelopmental sequelae in early childhood                                                          | 47 (46, 1, 0)  | Neonates          | Cerebral infarction                                                     | <ul style="list-style-type: none"> <li>• Neurological examination</li> <li>• Mental Development Index of BSID-II</li> </ul>                                                                                                                                                                           |
| Steinlin 2004 <sup>31</sup> | Analyze initial presentation, etiology, and long-term outcome of children suffering ischemic stroke                                                                                                                                         | 20 (16, 2, 2)  | 6 mo – 16.2 years | Ischemic Stroke                                                         | <ul style="list-style-type: none"> <li>• Nonstandard Patient and Parent Questionnaires concerning: actual health, problems in daily living, speech, social life, school problems, and lifestyle satisfaction</li> <li>• mRS</li> </ul>                                                                |
| Trauner 1993 <sup>32</sup>  | Better define neurological and developmental implications of neonatal stroke                                                                                                                                                                | 29 (29, 0, 0)  | Neonates          | All, excluding multiple unilateral or bilateral lesions, chronic or     | <ul style="list-style-type: none"> <li>• Standard neurological examination</li> <li>• Stanford-Binet Intelligence Scale (ages 2-4)</li> <li>• WPPSI</li> <li>• WISC-R</li> </ul>                                                                                                                      |

|                                               |                                                                                                                                                                                                                  |                 |          |                                                                                           |                                                                                                                                                               |
|-----------------------------------------------|------------------------------------------------------------------------------------------------------------------------------------------------------------------------------------------------------------------|-----------------|----------|-------------------------------------------------------------------------------------------|---------------------------------------------------------------------------------------------------------------------------------------------------------------|
|                                               |                                                                                                                                                                                                                  |                 |          | potentially evolving lesions, or evidence of a disorder that produced global brain damage |                                                                                                                                                               |
| Westmacott <sup>‡</sup><br>2009 <sup>33</sup> | Determine long-term neuropsychological implications of neonatal arterial ischemic stroke (AIS)                                                                                                                   | 120 (26, 94, 0) | Neonates | AIS                                                                                       | <ul style="list-style-type: none"> <li>• PSOM</li> <li>• WPPSI-R and WPPSI-III</li> <li>• WISC-III and WISC-IV</li> </ul>                                     |
| Wulfeck<br>1991 <sup>34</sup>                 | In infants with localized, unilateral cerebral infarction: examine neurologic status, investigate psychomotor, cognitive, and language abilities, and examine relationships between behavior and lesion severity | 14 (14, 0, 0)   | Infants  | Cerebral Infarction                                                                       | <ul style="list-style-type: none"> <li>• Neurologic examination</li> <li>• BSID</li> <li>• Sequenced Inventory of Communication Development (SICD)</li> </ul> |

- \* Symbol Digit Modalities Test (SDMT), Trail Making Test, Parts A and B (TMT-A, TMT-B), California Verbal Learning Test (CVLT), Rivermead Behavioural Memory Test (RBMT), Revised Token Test (RTT), Reporter's Test, Wechsler Intelligence Scale for Children and Adults (WISC-III, WAIS-R)
- <sup>†</sup> TNO-AZL = The Netherlands Organization for Applied Scientific Research Academic Medical Center Leiden; TAPQOL = Preschool Children Quality of Life Questionnaire for children aged 1-6; TACQOL-PF = Children's Quality of Life Questionnaire Parent Form; TACQOL-CF = Children's Quality of Life Questionnaire Child Form; TAAQOL = Adolescents' Quality of Life Questionnaire for adolescents aged 16 years and older
- <sup>‡</sup> Indicates overlapping sample sets from The Hospital for Sick Children, Toronto, Ontario, Canada and the Children's Hospital at Chedoke-McMaster, Hamilton, Ontario, Canada
- <sup>§</sup> Wechsler Intelligence Scale for Children (WISC-III), Wechsler Adult Intelligence Scale (WAIS), German version of the California Verbal Learning Test (CVLT), Rey-Osterrieth Figure, Test of Attentional Performance (TAP), Dual-Task Paradigm, Kaufman Assessment Battery for Children
- <sup>||</sup> Studies using the GOS include "death" as a follow-up outcome; therefore, Total N is not the sum of N at f/u, N f/u not available, and N deaths.
- <sup>¶</sup> Indicates overlapping sample sets from Max, et al. study: Max, J.E., Mathews, K., Lansing, A.E., Robertson, B.A.M., Fox, P., Lancaster, J., Manes, F.F., & Smith, J. (2002). Psychiatric disorders after childhood stroke. *Journal of the American Academy of Child and Adolescent Psychiatry*, 41, 555–562.
- <sup>#</sup> Schedule for Affective Disorders and Schizophrenia for School-Aged Children, Present and Lifetime Version (K-SADS-PL), Children's Global Assessment Scale (CGAS), Neuropsychiatric Rating Schedule (NPRS), Wechsler Intelligence Scale for Children (WISC-III), Wide-Range Achievement Test-Revised (WRAT-R), Multilingual Aphasia Examination (MAE) Sentence Repetition, MAE Token Test, Test of Written Language (TOWL-3), Developmental Test of Visual-Motor Integration (VMI), California Verbal Learning Test – Children's Version (CVLT-C), Rey-Osterrieth Complex Figure Test (REY-O), Design Fluency, Multilingual Aphasia Examination Controlled Oral Word Association (COWA), Wisconsin Card Sorting Test (WCST)
- <sup>\*\*</sup> Bayley Scales of Infant Development (BSID-II) (age range 0-42 months), Kaufman Assessment Battery for Children (K-ABC), Hamburg-Wechsler Intelligence Test for Children (HAWIK-III, German version of WISC-R) (age range 6.0-16.11 years), and the Hamburg-Wechsler Intelligence Test for Adults (HAWIE-R, German version of WAIS-R) (age range 16-74 years).

| <b>Supplemental Table 2. Outcome Measures in Pediatric Stroke Studies, Expanded Version</b>       |                                                                                                                                                                                                                                                                                                                                                                                                                                                                                                                               |                               |                                                                          |                         |                            |                                   |                                                       |                          |
|---------------------------------------------------------------------------------------------------|-------------------------------------------------------------------------------------------------------------------------------------------------------------------------------------------------------------------------------------------------------------------------------------------------------------------------------------------------------------------------------------------------------------------------------------------------------------------------------------------------------------------------------|-------------------------------|--------------------------------------------------------------------------|-------------------------|----------------------------|-----------------------------------|-------------------------------------------------------|--------------------------|
| <b>Name</b>                                                                                       | <b>Description</b>                                                                                                                                                                                                                                                                                                                                                                                                                                                                                                            | <b>Age Range</b>              | <b>Length</b>                                                            | <b>Stroke Validity?</b> | <b>Pediatric Validity?</b> | <b>Pediatric Stroke Validity?</b> | <b>Interrater Reliability*</b>                        | <b>Used in N Studies</b> |
| Barthel Index (BI)                                                                                | <ul style="list-style-type: none"> <li>Measures ability to do Activities of Daily Living (ADLs)</li> <li>Score 0-5, 0-10, or 0-15 for certain ADLs, with 0 indicating inability to perform independently</li> <li>Total score ranges from 0-100</li> <li>No training: completed by observation in accordance with scale as written<sup>35</sup></li> </ul>                                                                                                                                                                    | None specified                | 5-10 min <sup>35</sup>                                                   | Yes <sup>36</sup>       | No                         | No                                | Pearson r score = 0.89-0.99 (in adults) <sup>36</sup> | 1                        |
| Battelle Developmental Inventory (BDI-2); Battelle Developmental Inventory Screening Test (BDIST) | <ul style="list-style-type: none"> <li>Assesses developmental skills<sup>37</sup></li> <li>450 items for full inventory, 96 for screening test<sup>38,39</sup></li> <li>Five domains: personal-social skills, adaptive behavior, motor ability, communication, and cognition<sup>38</sup></li> <li>Structured items and observation for children and interview with caregiver<sup>39</sup></li> <li>Administrator should be qualified in childhood education or healthcare; training is four hours<sup>37,40</sup></li> </ul> | Birth - 8 years <sup>37</sup> | Complete: 1-2 hours<br><br>Screening Test: 10-30 min <sup>37</sup>       | No                      | Yes <sup>40</sup>          | No                                | ICC: 0.90-0.99 <sup>41</sup>                          | 0                        |
| Bayley Scales of Infant and Toddler Development, Third Edition (BSID-III)                         | <ul style="list-style-type: none"> <li>Evaluates developmental delay in infants and pre-schoolers<sup>42</sup></li> <li>Scales for five areas: Adaptive behavior, cognition, language, motor, and social-emotional<sup>42</sup></li> <li>Parental questionnaire and direct observation by specialist in childhood development, such as a psychologist or a physician<sup>42</sup></li> </ul>                                                                                                                                  | 1-42 months <sup>42</sup>     | 30-90 minutes, depending on age <sup>42</sup>                            | No                      | Yes <sup>43</sup>          | No                                | ICC: 0.47-0.96, depending on scale <sup>43</sup>      | 6                        |
| California Verbal Learning Test – Children’s Version (CVLT-C)                                     | <ul style="list-style-type: none"> <li>Assess verbal learning and memory in children and adolescents<sup>44</sup></li> <li>Consists of everyday memory task in which child recalls a list. Short- and long- delay free recall and cued recall are performed along with a recognition task<sup>44,45</sup></li> <li>Can be administered by trained examiner, including provider or assistant. Hand-grading is possible though computer</li> </ul>                                                                              | 5-16.11 years <sup>44</sup>   | 15-20 min, plus 20 min interval for delayed recall measure <sup>44</sup> | No                      | Yes <sup>46</sup>          | No                                | n/a                                                   | 4                        |

|                                            |                                                                                                                                                                                                                                                                                                                                                                                                                                                    |                                                               |                                                               |    |                   |    |                                                       |   |
|--------------------------------------------|----------------------------------------------------------------------------------------------------------------------------------------------------------------------------------------------------------------------------------------------------------------------------------------------------------------------------------------------------------------------------------------------------------------------------------------------------|---------------------------------------------------------------|---------------------------------------------------------------|----|-------------------|----|-------------------------------------------------------|---|
|                                            | calculation is recommended <sup>45</sup>                                                                                                                                                                                                                                                                                                                                                                                                           |                                                               |                                                               |    |                   |    |                                                       |   |
| Child Health Questionnaire (CHQ)           | <ul style="list-style-type: none"> <li>Assesses a child's physical, emotional, and social well-being from the perspective of a parent/guardian or child, depending on the form<sup>47</sup></li> <li>Consists of 28 or 50 items for parents, and 87 items for children, measuring 14 physical and psychosocial concepts<sup>47</sup></li> <li>Can be administered by anyone<sup>47</sup></li> </ul>                                                | 5-18 years; Self-assessment for $\geq 10$ years <sup>47</sup> | Parent Form: 10-15 min.; Child Form: 15-25 min. <sup>47</sup> | No | Yes <sup>48</sup> | No | n/a                                                   | 2 |
| Denver Developmental Screening Tests II    | <ul style="list-style-type: none"> <li>Determines if a child's development is within the normal range<sup>49</sup></li> <li>Consists of 125 items in the personal-social, fine motor-adaptive, language, and gross motor domains<sup>50</sup></li> <li>Administration directions can be followed by anyone with good child skills<sup>49</sup></li> </ul>                                                                                          | Infants and Preschoolers (up to 6 years) <sup>50</sup>        | 20 min. <sup>51</sup>                                         | No | Yes <sup>50</sup> | No | Kappa statistic $\geq 0.75$ <sup>52</sup>             | 2 |
| Diener Satisfaction with Life Scale (DSLS) | <ul style="list-style-type: none"> <li>Measures life satisfaction, defined as one part of subjective "well-being"</li> <li>Five items scored 1-7</li> <li>Total score of 5-35, with 35 indicating the highest level of satisfaction</li> <li>Completed by patient without administrator<sup>53</sup></li> </ul>                                                                                                                                    | Older juveniles to adults <sup>53</sup>                       | 5 min. max <sup>54</sup>                                      | No | No                | No | n/a                                                   | 1 |
| Disability Rating Scale (DRS)              | <ul style="list-style-type: none"> <li>Designed to evaluate impairment, disability, and handicap for those with traumatic brain injury<sup>55</sup></li> <li>Eight items valued at 4, 5, or 6; total of 29-point scale with 30 indicating death<sup>5655</sup></li> <li>Self-administered or scored by an interview with family member<sup>55</sup></li> <li>Limited training recommended<sup>55</sup></li> </ul>                                  | Older juveniles to adults <sup>55</sup>                       | 15 min. max <sup>55</sup>                                     | No | No                | No | Pearson r score = 0.97-0.98 (in adults) <sup>55</sup> | 0 |
| Extended Glasgow Outcome Scale (GOS-E)     | <ul style="list-style-type: none"> <li>Global measure of outcome</li> <li>Eight categories (1-8): dead, vegetative, lower severe disability, upper severe disability, lower moderate disability, upper moderate disability, lower good recovery, upper good recovery</li> <li>Rating scale completed by healthcare professional upon direct examination, structured personal interview, and/or retrospective record review<sup>57</sup></li> </ul> | None specified; suggested $\geq 16$ years <sup>58</sup>       | Varies with length of structured interview <sup>58</sup>      | No | No                | No | Weighted Kappa statistic: 0.84-0.85 <sup>5859</sup>   | 0 |



|                                                         |                                                                                                                                                                                                                                                                                                                                                                                                                                                                                                                                                                                        |                                                                                                                      |                                                              |                   |                   |    |                                                                        |   |
|---------------------------------------------------------|----------------------------------------------------------------------------------------------------------------------------------------------------------------------------------------------------------------------------------------------------------------------------------------------------------------------------------------------------------------------------------------------------------------------------------------------------------------------------------------------------------------------------------------------------------------------------------------|----------------------------------------------------------------------------------------------------------------------|--------------------------------------------------------------|-------------------|-------------------|----|------------------------------------------------------------------------|---|
| Functional Independence Measure for Children (WeeFIM)   | <ul style="list-style-type: none"> <li>Measures functional independence<sup>60</sup></li> <li>18 items for 3 main domains: self-care, mobility, and cognition<sup>60</sup></li> <li>Scale of 1-7 based on items, with 1 indicating “total assistance” and 7 indicating “complete independence”<sup>60</sup></li> <li>Scores of 1-5 denote “dependence”, whereas 6-7 are “independent”<sup>60,61</sup></li> <li>Administered by trained health, developmental, or educational professionals via structured parental interview or direct observation of child<sup>61,62</sup></li> </ul> | 6 months – 7 years; 6 months – 21 years for anyone with dev. Disability; specific module for 0-3 years <sup>60</sup> | No time limit for tasks, generally <20 min. <sup>61,63</sup> | No                | Yes <sup>64</sup> | No | ICC: 0.88-0.99 <sup>65</sup>                                           | 0 |
| Glasgow Outcome Scale (GOS)                             | <ul style="list-style-type: none"> <li>Global measure of outcome<sup>66</sup></li> <li>Five categories (1-5): dead, vegetative, severely disabled, moderately disabled, and good recovery<sup>66</sup></li> <li>Rating scale completed by healthcare professional upon direct examination, unstructured personal interview, and/or retrospective record review<sup>67</sup></li> </ul>                                                                                                                                                                                                 | None specified                                                                                                       | 5 min. max <sup>66</sup>                                     | No                | No                | No | Weighted Kappa statistic: 0.31-0.79, depending on raters <sup>67</sup> | 2 |
| Griffiths Scales of Mental Development                  | <ul style="list-style-type: none"> <li>Obtains level of mental development in infants and young children<sup>68</sup></li> <li>Split into two groups: 0-2 and 2-8 years<sup>68</sup></li> <li>0-2 group has locomotor, personal-social, hearing-speech, eye-hand coordination, and performance scales; 3-8 adds practical reasoning scale<sup>68</sup></li> <li>Professionals must be trained by a course or a tutor to administer<sup>68</sup></li> </ul>                                                                                                                             | 0-8 years <sup>68</sup>                                                                                              | 50-60 min. <sup>69</sup>                                     | No                | Yes <sup>69</sup> | No | Varies by scale, but overall mostly >0.60 <sup>68</sup>                | 3 |
| King’s Outcome Scale for Childhood Head Injury (KOSCHI) | <ul style="list-style-type: none"> <li>The GOS-E, adapted for children</li> <li>Eight categories: dead, vegetative, severe disability (no self-care), severe disability (child assists with activities), moderate disability (supervision), moderate disability (independent with sequelae), good recovery (non-interfering sequelae), good recovery (no detectable sequelae)</li> <li>Rating scale completed by healthcare professional upon observation, interview, and/or retrospective record review<sup>70,71</sup></li> </ul>                                                    | 2-16 years <sup>70</sup>                                                                                             | Varies with method of obtaining clinical info <sup>70</sup>  | No                | Yes <sup>70</sup> | No | Cohen’s Kappa: ~0.50 <sup>70,71</sup>                                  | 1 |
| Modified Rankin Scale (mRS)                             | <ul style="list-style-type: none"> <li>Global measure that focuses on symptoms</li> </ul>                                                                                                                                                                                                                                                                                                                                                                                                                                                                                              | Original RS                                                                                                          | 5 min. <sup>72</sup>                                         | Yes <sup>73</sup> | No                | No | Weighted Kappa                                                         | 4 |

|                                                      |                                                                                                                                                                                                                                                                                                                                                                                                                                    |                                                                  |                                            |                     |                      |                     |                                                                     |   |
|------------------------------------------------------|------------------------------------------------------------------------------------------------------------------------------------------------------------------------------------------------------------------------------------------------------------------------------------------------------------------------------------------------------------------------------------------------------------------------------------|------------------------------------------------------------------|--------------------------------------------|---------------------|----------------------|---------------------|---------------------------------------------------------------------|---|
|                                                      | <p>and disability after stroke<sup>72</sup></p> <ul style="list-style-type: none"> <li>• Score 0-6: no symptoms, no significant disability, slight disability, moderate disability, moderate severe disability, severe disability, and death<sup>72</sup></li> <li>• Administered by a health care professional with a decision tool<sup>72</sup></li> </ul>                                                                       | designed for > 60 years, but used with other pops. <sup>73</sup> |                                            |                     |                      |                     | statistic ranges from 0.71 to 0.93 <sup>73</sup>                    |   |
| Mullen Scales of Early Learning (MSEL)               | <ul style="list-style-type: none"> <li>• Assesses cognitive and motor ability in children</li> <li>• Five scales: gross motor, fine motor, visual reception, expressive language, and receptive language</li> <li>• Administered by professional specifically trained for MSEL administration<sup>74</sup></li> </ul>                                                                                                              | Birth-68 months <sup>74</sup>                                    | 15-60 min., depending on age <sup>74</sup> | No                  | Yes <sup>74</sup>    | No                  | ICC: 0.91-0.99 <sup>75</sup>                                        | 0 |
| Neurobehavioral Functioning Inventory (NFI)          | <ul style="list-style-type: none"> <li>• Two surveys, for patients and family, that assess behavior and symptoms associated with TBI</li> <li>• 76 items test depression, somatic, memory/attention, communication, aggression, and motor</li> <li>• Self-administered with instructions<sup>76</sup></li> </ul>                                                                                                                   | Not specified                                                    | 10-15 min. <sup>76</sup>                   | No                  | No                   | No                  | Agreement between patients and family members: 48-84% <sup>77</sup> | 0 |
| Pediatric Evaluation of Disability Inventory (PEDI)  | <ul style="list-style-type: none"> <li>• Measures self-care, mobility, and social function on three scales: functional skills, caregiver assistance, and modifications<sup>78</sup></li> <li>• Overall scores given for each domain<sup>78</sup></li> <li>• Detailed, structured interview by research assistant or other healthcare professional<sup>79</sup></li> </ul>                                                          | 6 months – 7 years <sup>78</sup>                                 | 45-60 min. <sup>79</sup>                   | No                  | Yes <sup>80</sup>    | No                  | ICC: 0.95-0.99 <sup>79</sup>                                        | 0 |
| Pediatric Quality of Life Inventory (PedsQL)         | <ul style="list-style-type: none"> <li>• Evaluates quality of life in children and adolescents<sup>81</sup></li> <li>• Separates by age: 2-4, 5-7, 8-12, 13-18, with self-reporting beginning at age 5</li> <li>• 23 items include physical, social, emotional, and school functioning</li> <li>• Disease-specific inventories available</li> <li>• Administered by trained professional or self-completed<sup>81</sup></li> </ul> | 2-18 years <sup>81</sup>                                         | 5 min. <sup>81</sup>                       | No                  | Yes <sup>81,82</sup> | No                  | n/a                                                                 | 1 |
| Pediatric Stroke Activity Limitation Measure (PSALM) | <ul style="list-style-type: none"> <li>• Measures ADLs in domains including gross motor, fine motor, self-care, communication, social and emotional function, and education<sup>83</sup></li> <li>• Score of 0-3 for each domain, with 0</li> </ul>                                                                                                                                                                                | Children (no specific age range provided)                        | 5 min. <sup>84</sup>                       | No <sup>85,84</sup> | No <sup>85,84</sup>  | No <sup>85,84</sup> | Cohen's Kappa: 0.89 <sup>83</sup>                                   | 1 |

|                                          |                                                                                                                                                                                                                                                                                                                                                                                                                                                                                                                                                                                                              |                                                  |                                                       |                    |                   |                   |                                                                   |   |
|------------------------------------------|--------------------------------------------------------------------------------------------------------------------------------------------------------------------------------------------------------------------------------------------------------------------------------------------------------------------------------------------------------------------------------------------------------------------------------------------------------------------------------------------------------------------------------------------------------------------------------------------------------------|--------------------------------------------------|-------------------------------------------------------|--------------------|-------------------|-------------------|-------------------------------------------------------------------|---|
|                                          | <p>indicating no disability and 3 indicating inability to perform<sup>83</sup></p> <ul style="list-style-type: none"> <li>Administered by healthcare professional<sup>84</sup></li> </ul>                                                                                                                                                                                                                                                                                                                                                                                                                    | <sup>84</sup>                                    |                                                       |                    |                   |                   |                                                                   |   |
| Pediatric Stroke Outcome Measure (PSOM)  | <ul style="list-style-type: none"> <li>Neurological assessment tool<sup>86</sup></li> <li>115 items measure behavior, mental status, cranial nerves, motor, gait, sensory, and cerebellar function<sup>86</sup></li> <li>Five subscales with scores of 0-2: right sensorimotor, left sensorimotor, language production, language comprehension, and cognitive and behavioral performance<sup>86</sup></li> <li>Total score of 0-10 dictates “normal”, “mild”, “moderate”, or “severe” deficit<sup>86</sup></li> <li>Standardized neurological exam administered by neurologist<sup>86</sup></li> </ul>       | 0-18 years <sup>86</sup>                         | n/a                                                   | Yes <sup>†86</sup> | Yes <sup>86</sup> | Yes <sup>86</sup> | 91% <sup>†86</sup>                                                | 7 |
| Short Form General Health Survey (SF-36) | <ul style="list-style-type: none"> <li>A generic measure that yields a profile of functional health and well-being scores, physical and mental health summary measures, and a preference-based health utility index<sup>87</sup></li> <li>Does not target a specific age, disease, or treatment group<sup>87</sup></li> <li>Can be self-administered, administered by a computer, or administered by a trained interviewer in person or via telephone<sup>87</sup></li> </ul>                                                                                                                                | ≥ 14 years <sup>87</sup>                         | 5-10 min. <sup>87</sup>                               | n/a                | n/a               | n/a               | n/a                                                               | 2 |
| Stanford-Binet Intelligence Scale        | <ul style="list-style-type: none"> <li>Assesses intelligence and cognitive abilities in fluid reasoning, knowledge, quantitative processing, visual-spatial processing, and working memory<sup>88</sup></li> <li>Ten subtests give a full-scale IQ, verbal and nonverbal IQ, and composite indices spanning 5 dimensions<sup>88</sup></li> <li>Range of scores is 40 to 160: standard score mean is 100, standard deviation is 15<sup>88</sup></li> <li>Administered by a competent examiner trained in psychology and individual intellectual assessment, preferably a psychologist<sup>89</sup></li> </ul> | ≥ 2 years <sup>88</sup>                          | Variable: approx. 5 minutes per subtest <sup>88</sup> | No                 | Yes <sup>90</sup> | No                | Interrater Reliability Coefficient Range: 0.74-0.97 <sup>90</sup> | 2 |
| Vineland Adaptive Behavior Scale (VABS)  | <ul style="list-style-type: none"> <li>Assesses personal and social function<sup>91</sup></li> <li>13 scores in 4 domains: communication, daily living skills, socialization, and motor skills<sup>91</sup></li> </ul>                                                                                                                                                                                                                                                                                                                                                                                       | 0-18 years, low-functioning adults <sup>92</sup> | 20-60 min. <sup>91</sup>                              | No                 | Yes <sup>91</sup> | No                | Interrater Reliability Coefficient Range:                         | 2 |

|                                    |                                                                                                                                                                                                                                                                                                                                                                                                                                                                                                                                                                                                                                                                                                                                                                |                               |                                         |    |                   |    |           |    |
|------------------------------------|----------------------------------------------------------------------------------------------------------------------------------------------------------------------------------------------------------------------------------------------------------------------------------------------------------------------------------------------------------------------------------------------------------------------------------------------------------------------------------------------------------------------------------------------------------------------------------------------------------------------------------------------------------------------------------------------------------------------------------------------------------------|-------------------------------|-----------------------------------------|----|-------------------|----|-----------|----|
|                                    | <ul style="list-style-type: none"> <li>Expanded form available<sup>91</sup></li> <li>Performed via semi-structured interview with social worker, psychologist, or equivalent<sup>91</sup></li> </ul>                                                                                                                                                                                                                                                                                                                                                                                                                                                                                                                                                           |                               |                                         |    |                   |    | 0.62-0.78 |    |
| Wechsler Intelligence Scales (WIS) | <ul style="list-style-type: none"> <li>Measures ability to adapt and constructively solve problems<sup>93</sup></li> <li>Three different scales: Preschool and Primary Scale of Intelligence (WPPSI-R; ages 4 – 6.5 years), WIS for Children (WISC; 6 – 16 years), and Adult Intelligence Scale (WAIS-III)<sup>93</sup></li> <li>Consists of two batteries of subtests in verbal and performance areas, which are summed to find an overall IQ score<sup>93</sup></li> <li>Score is normative with mean 100 and standard deviation 15. Mental retardation is considered 49 and below, while gifted is 130 and above<sup>93</sup></li> <li>Administered to individual examinees by trained examiner using complex set of test materials<sup>93</sup></li> </ul> | 4 years – adult <sup>93</sup> | Core subtests: 60-90 min. <sup>94</sup> | No | Yes <sup>94</sup> | No | n/a       | 15 |

\* Information on interrater reliability is as specific as possible. For some outcome measures, details of interrater reliability were not reported in numerical form.

† Validated for AIS and CVST but not ICH

‡ From initial study. New deVeber manuscript in submission process: personal communication

## Supplemental References

1. Beslow LA, Licht DJ, Smith SE, et al. Predictors of Outcome in Childhood Intracerebral Hemorrhage A Prospective Consecutive Cohort Study. *Stroke*. 2010;41(2):313-318.
2. Block GW, Nanson JL, Lawry NJ. Attention, Memory, and Language after Pediatric Ischemic Stroke. *Child Neuropsychology*. 1999;5(2):81.
3. Brouwer AJ, Groenendaal F, Koopman C, Nieuvelstein RA, Han SK, de Vries LS. Intracranial hemorrhage in full-term newborns: a hospital-based cohort study. *Neuroradiology*. 2010;52(6):567-576.
4. Christerson S, Stromberg B. Stroke in Swedish children II: long-term outcome. *Acta Paediatr*. 2010.
5. Cnossen MH, Aarsen FK, Van Den Akker SLJ, et al. Paediatric arterial ischaemic stroke: functional outcome and risk factors. *Dev Med Child Neurol*. 2010;52(4):394-399.
6. De Schryver EL, Kappelle LJ, Jennekens-Schinkel A, Boudewyn Peters AC. Prognosis of ischemic stroke in childhood: a long-term follow-up study. *Dev Med Child Neurol*. 2000;42(5):313-318.
7. Delsing BJ, Catsman-Berrevoets CE, Appel IM. Early prognostic indicators of outcome in ischemic childhood stroke. *Pediatr Neurol*. 2001;24(4):283-289.
8. deVeber GA, MacGregor D, Curtis R, Mayank S. Neurologic outcome in survivors of childhood arterial ischemic stroke and sinovenous thrombosis. *J Child Neurol*. 2000;15(5):316-324.
9. Domi T, Edgell DS, McCrindle BW, et al. Frequency, predictors, and neurologic outcomes of vaso-occlusive strokes associated with cardiac surgery in children. *Pediatrics*. 2008;122(6):1292-1298.
10. Everts R, Pavlovic J, Kaufmann F, et al. Cognitive functioning, behavior, and quality of life after stroke in childhood. *Child Neuropsychol*. 2008;14(4):323-338.
11. Friefeld S, Yeboah O, Jones JE, deVeber G. Health-related quality of life and its relationship to neurological outcome in child survivors of stroke. *CNS Spectr*. 2004;9(6):465-475.
12. Ganesan V, Hogan A, Shack N, Gordon A, Isaacs E, Kirkham FJ. Outcome after ischaemic stroke in childhood. *Dev Med Child Neurol*. 2000;42(7):455-461.
13. Gordon AL, Ganesan V, Towell A, Kirkham FJ. Functional outcome following stroke in children. *J Child Neurol*. 2002;17(6):429-434.
14. Hariman L, Griffith ER, Hurtig AL, Keehn MT. Functional outcomes of children with sickle-cell disease affected by stroke. *Arch Phys Med Rehabil*. 1991;72(7):498-502. <http://search.ebscohost.com/login.aspx?direct=true&db=rzh&AN=1991126631&site=ehost-live>.
15. Hetherington R, Tuff L, Anderson P, Miles B, deVeber G. Short-term intellectual outcome after arterial ischemic stroke and sinovenous thrombosis in childhood and infancy. *J Child Neurol*. 2005;20(7):553-559.
16. Hurvitz E, Warschausky S, Berg M, Tsai S. Long-term functional of outcome of pediatric stroke survivors. *Top Stroke Rehabil*. 2004;11(2):51-59.
17. Jordan LC, Kleinman JT, Hillis AE. Intracerebral Hemorrhage Volume Predicts Poor Neurologic Outcome in Children. *Stroke*. 2009;40(5):1666-1671.
18. Kim C, Han J, Kim H. Pediatric Stroke Recovery: A Descriptive Analysis. *Arch Phys Med Rehabil*. 2009;90(4):657-662.
19. Kumar R, Shukla D, Mahapatra AK. Spontaneous Intracranial Hemorrhage in Children. *Pediatr Neurosurg*. 2009;45(1):37-45.
20. Lansing AE, Max JE, Delis DC, et al. Verbal learning and memory after childhood stroke. *J Int Neuropsychol Soc*. 2004;10(5):742-752.

21. Lo WD, Lee J, Rusin J, Perkins E, Roach ES. Intracranial hemorrhage in children: an evolving spectrum. *Arch Neurol*. 2008;65(12):1629-1633.
22. Max JE, Robin DA, Taylor HG, et al. Attention function after childhood stroke. *J Int Neuropsychol Soc*. 2004;10(7):976-986.
23. Max JE, Bruce M, Keatley E, Delis D. Pediatric Stroke: Plasticity, Vulnerability, and Age of Lesion Onset. *J Neuropsychiatry Clin Neurosci*. 2010;22(1):30-39.
24. McLinden A, Baird AD, Westmacott R, Anderson PE, deVeber G. Early cognitive outcome after neonatal stroke. *J Child Neurol*. 2007;22(9):1111-1116.
25. Mercuri E, Cowan F, Gupte G, et al. Prothrombotic disorders and abnormal neurodevelopmental outcome in infants with neonatal cerebral infarction. *Pediatrics*. 2001;107(6):1400-1404.
26. Mercuri E, Barnett A, Rutherford M, et al. Neonatal cerebral infarction and neuromotor outcome at school age. *Pediatrics*. 2004;113(1):95-100.
27. Pavlovic J, Kaufmann F, Boltshauser E, et al. Neuropsychological problems after paediatric stroke: Two year follow-up of Swiss children. *Neuropediatrics*. 2006;37(1):13-19.
28. Ricci D, Mercuri E, Barnett A, et al. Cognitive outcome at early school age in term- born children with perinatally acquired middle cerebral artery territory infarction. *Stroke*. 2008;39(2):403-410.
29. Salih MA, Abdel-Gader AGM, Al-Jarallah AA, Kentab AY, Al-Nasser MN. Outcome of stroke in Saudi children. *Saudi Med J*. 2006;27:S91-S96.
30. Sreenan C, Bhargava R, Robertson C. Cerebral infarction in the term newborn: clinical presentation and long-term outcome. *J Pediatr*. 2000;137(3):351-355. <http://search.ebscohost.com/login.aspx?direct=true&db=rzh&AN=2000077190&site=ehost-live>.
31. Steinlin M, Roellin K, Schroth G. Long-term follow-up after stroke in childhood. *Eur J Pediatr*. 2004;163(4-5):245-250.
32. Trauner DA, Chase C, Walker P, Wulfeck B. Neurologic profiles of infants and children after perinatal stroke. *Pediatr Neurol*. 1993;9(5):383-386.
33. Westmacott R, MacGregor D, Askalan R, deVeber G. Late Emergence of Cognitive Deficits After Unilateral Neonatal Stroke. *Stroke*. 2009;40(6):2012-2019.
34. Wulfeck BB, Trauner DA, Tallal PA. Neurologic, Cognitive, and Linguistic Features of Infants After Early Stroke. *Pediatr Neurol*. 1991;7(4):266-269.
35. MAHONEY FI, BARTHEL DW. Functional Evaluation: the Barthel Index. *Md State Med J*. 1965;14:61-65.
36. Kasner SE. Clinical interpretation and use of stroke scales. *Lancet Neurol*. 2006;5(7):603-612.
37. Newborg J. Battelle Developmental Inventory, Second Edition (BDI-2). <http://www.riversidepublishing.com/products/bdi2/index.html>. Updated 2011. Accessed March 25, 2011.
38. Matson JL, Neal D, Fodstad JC, Hess JA. The relation of social behaviours and challenging behaviours in infants and toddlers with Autism Spectrum Disorders. *Dev Neurorehabil*. 2010;13(3):164-169.
39. Newborg J. Battelle Developmental Inventory, Second Edition. <http://www.assess.nelson.com/test-ind/bdi.html>. Updated 2009. Accessed March 25, 2011.
40. Glascoe FP, Martin ED, Humphrey S. A comparative review of developmental screening tests. *Pediatrics*. 1990;86(4):547-554.
41. Berls AT, McEwen IR. Battelle developmental inventory. *Phys Ther*. 1999;79(8):776-783.

42. Bayley Scales of Infant Development, Second Edition (BSID-II). [http://www.acf.hhs.gov/programs/opre/ehs/perf\\_measures/reports/resources\\_measuring/res\\_meas\\_cdif.html](http://www.acf.hhs.gov/programs/opre/ehs/perf_measures/reports/resources_measuring/res_meas_cdif.html). Accessed March 11, 2011.
43. Bayley N. Bayley Scales of Infant and Toddler Development, Third Edition (Bayley-III). Pearson Assessment and Information Web site. <http://www.pearsonassessments.com/HAIWEB/Cultures/en-us/Productdetail.htm?Pid=015-8027-23X>. Updated 2005. Accessed March/11, 2011.
44. Delis DC, Kramer JH, Kaplan E, Ober BA. California Verbal Learning Test - Children's Version (CVLT-C). <http://www.pearsonassessments.com/HAIWEB/Cultures/en-us/Productdetail.htm?Pid=015-8033-957>. Updated 1994. Accessed March 11, 2011.
45. Elwood RW. The California Verbal Learning Test: psychometric characteristics and clinical application. *Neuropsychol Rev.* 1995;5(3):173-201.
46. Jacobs ML, Donders J. Criterion validity of the California Verbal Learning Test-Second Edition (CVLT-II) after traumatic brain injury. *Arch Clin Neuropsychol.* 2007;22(2):143-149.
47. CHQ: Child Health Questionnaire. <http://www.healthact.com/survey-chq.php>. Updated 2011. Accessed March 11, 2011.
48. Waters E, Salmon L, Wake M, Hesketh K, Wright M. The Child Health Questionnaire in Australia: reliability, validity, and population means. *Aust N Z J Public Health.* 2007;24(2):207.
49. Benefits of the DENVER II. <http://www.denverii.com/benefits.html>. Updated 2010. Accessed March 11, 2011.
50. Frankenburg WK, Dodds JB. The Denver developmental screening test. *J Pediatr.* 1967;71(2):181-191.
51. Schonwald A. Screening Tools - Denver II. Developmental Screening Tool Kit for Primary Care Providers Web site. [http://www.developmentalscreening.org/screening\\_tools/denverii.htm](http://www.developmentalscreening.org/screening_tools/denverii.htm). Updated 2007. Accessed March 11, 2011.
52. Frankenburg WK, Dodds J, Archer P, Shapiro H, Bresnick B. The Denver II: a major revision and restandardization of the Denver Developmental Screening Test. *Pediatrics.* 1992;89(1):91-97.
53. Diener E, Emmons RA, Larsen RJ, Griffin S. The Satisfaction With Life Scale. *J Pers Assess.* 1985;49(1):71-75.
54. Corrigan JD. Satisfaction with Life Scale. <http://www.tbims.org/combi/swls/index.html>. Updated 2000. Accessed March 25, 2011.
55. Wright J. The Disability Rating Scale. <http://tbims.org/combi/drs/>. Updated 2000. Accessed March 25, 2011.
56. Eilander HJ, Timmerman RB, Scheirs JG, Van Heugten CM, De Kort PL, Prevo AJ. Children and young adults in a prolonged unconscious state after severe brain injury: long-term functional outcome as measured by the DRS and the GOSE after early intensive neurorehabilitation. *Brain Inj.* 2007;21(1):53-61.
57. Sander A. The Extended Glasgow Outcome Scale. <http://tbims.org/combi/gose/>. Updated 2002. Accessed March 25, 2011.
58. Wilson JT, Pettigrew LE, Teasdale GM. Structured interviews for the Glasgow Outcome Scale and the extended Glasgow Outcome Scale: guidelines for their use. *J Neurotrauma.* 1998;15(8):573-585.
59. Pettigrew LE, Wilson JT, Teasdale GM. Reliability of ratings on the Glasgow Outcome Scales from in-person and telephone structured interviews. *J Head Trauma Rehabil.* 2003;18(3):252-258.
60. The WeeFIM II Advantage. [http://www.udsmr.org/Documents/WeeFIM/WeeFIM\\_II\\_System.pdf](http://www.udsmr.org/Documents/WeeFIM/WeeFIM_II_System.pdf). Updated 2011. Accessed March 28, 2011.
61. Wong V, Wong S, Chan K, Wong W. Functional Independence Measure (WeeFIM) for Chinese children: Hong Kong Cohort. *Pediatrics.* 2002;109(2):E36.

62. Stein J, Harvey RL, Macko RF, Winstein CJ, Zorowitz RD. Rehabilitation of Children After Stroke. In: *Stroke Recovery and Rehabilitation*. New York: Demos Medical Publishing; 2009:617.
63. Ottenbacher KJ, Msall ME, Lyon N, et al. The WeeFIM instrument: its utility in detecting change in children with developmental disabilities. *Arch Phys Med Rehabil*. 2000;81(10):1317-1326.
64. Chen CC, Bode RK, Granger CV, Heinemann AW. Psychometric properties and developmental differences in children's ADL item hierarchy: a study of the WeeFIM instrument. *Am J Phys Med Rehabil*. 2005;84(9):671-679.
65. Jongjit J, Komsopapong L, Saikaew T, et al. Reliability of the functional independence measure for children in normal Thai children. *Pediatr Int*. 2006;48(2):132-137.
66. Jennett B, Bond M. Assessment of outcome after severe brain damage. *Lancet*. 1975;1(7905):480-484.
67. Anderson SI, Housley AM, Jones PA, Slattery J, Miller JD. Glasgow Outcome Scale: an inter-rater reliability study. *Brain Inj*. 1993;7(4):309-317.
68. Smith JA, Bidder RT, Gardner SM, Gray OP. Griffiths Scales of Mental Development and different users. *Child Care Health Dev*. 1980;6(1):11-16.
69. Griffiths R. Griffiths Mental Development Scales - Revised. <http://www.hogrefe.co.uk/?/test/show/35/>. Updated 1996. Accessed March 11, 2011.
70. Crouchman M, Rossiter L, Colaco T, Forsyth R. A practical outcome scale for paediatric head injury. *Arch Dis Child*. 2001;84(2):120-124.
71. Calvert S, Miller HE, Curran A, et al. The King's Outcome Scale for Childhood Head Injury and injury severity and outcome measures in children with traumatic brain injury. *Dev Med Child Neurol*. 2008;50(6):426-431.
72. Rankin J. Modified Rankin Scale. <http://www.strokecenter.org/trials/scales/rankin.html>. Accessed March 11, 2011.
73. Banks JL, Marotta CA. Outcomes validity and reliability of the modified Rankin scale: implications for stroke clinical trials: a literature review and synthesis. *Stroke*. 2007;38(3):1091-1096.
74. Mullen EM. Mullen Scales of Early Learning. <http://www.pearsonassessments.com/HAIWEB/Cultures/en-us/Productdetail.htm?Pid=PAa11150>. Updated 2011. Accessed March 25, 2011.
75. Mullen EM. Mullen Scales of Early Learning, AGS Edition, 1995. [http://www.acf.hhs.gov/programs/opre/ehs/perf\\_measures/reports/resources\\_measuring/res\\_meas\\_cdibb.html](http://www.acf.hhs.gov/programs/opre/ehs/perf_measures/reports/resources_measuring/res_meas_cdibb.html). Updated 1995. Accessed March 25, 2011.
76. Marwitz J. The Neurobehavioral Functioning Inventory. <http://www.tbims.org/combi/nfi>. Updated 2000. Accessed March 28, 2011.
77. Seel RT, Kreutzer JS, Sander AM. Concordance of patients' and family members' ratings of neurobehavioral functioning after traumatic brain injury. *Arch Phys Med Rehabil*. 1997;78(11):1254-1259.
78. Haley SM, Coster WJ, Ludlow LH, Haliwanger JT, Andrellos PJ. Pediatric Evaluation of Disability Inventory. <http://www.pearsonassessments.com/HAIWEB/Cultures/en-us/Productdetail.htm?Pid=076-1617-647&Mode=summary>. Updated 1992. Accessed March 28, 2011.
79. Berg M, Jahnsen R, Froslic KF, Hussain A. Reliability of the Pediatric Evaluation of Disability Inventory (PEDI). *Phys Occup Ther Pediatr*. 2004;24(3):61-77.
80. Feldman AB, Haley SM, Coryell J. Concurrent and construct validity of the Pediatric Evaluation of Disability Inventory. *Phys Ther*. 1990;70(10):602-610.



81. Varni JW. The PedsQL Measurement Model for the Pediatric Quality of Life Inventory. [http://www.pedsqol.org/about\\_pedsqol.html](http://www.pedsqol.org/about_pedsqol.html). Updated 2011. Accessed March 28, 2011.
82. Varni JW, Seid M, Rode CA. The PedsQL: measurement model for the pediatric quality of life inventory. *Med Care*. 1999;37(2):126-139.
83. Ichord R. Neurologic Outcome Assessment in Childhood Acquired Brain Injury. . 2010.
84. Gordon AL, Ganesan V, Towell A, Kirkham FJ. Functional outcome following stroke in children. *J Child Neurol*. 2002;17(6):429-434.
85. Sofronas M, Ichord RN, Fullerton HJ, et al. Pediatric stroke initiatives and preliminary studies: What is known and what is needed? *Pediatr Neurol*. 2006;34(6):439-445.
86. deVeber GA, MacGregor D, Curtis R, Mayank S. Neurologic outcome in survivors of childhood arterial ischemic stroke and sinovenous thrombosis. *J Child Neurol*. 2000;15(5):316-324.
87. Ware JE. SF-36 Health Survey Update. The SF Community Web site. <http://www.sf-36.org/tools/sf36.shtml>. Accessed March 11, 2011.
88. Roid G. Stanford-Binet Intelligence Scales, Fifth Edition (SB5). <http://www.assess.nelson.com/test-ind/stan-b5.html>. Updated 2003. Accessed March 11, 2011.
89. Marom JP. Stanford-Binet Intelligence Scale. <http://www.minddisorders.com/Py-Z/Stanford-Binet-Intelligence-Scale.html>. Accessed March 11, 2011.
90. Roid G. Stanford-Binet Intelligence Scale: 5th Edition (SB5). <http://www.cps.nova.edu/~cpphelp/SB5.html>. Accessed March 11, 2011.
91. Sparrow SS, Balla DA, Cicchetti DV. Vineland Adaptive Behavior Scales. <http://www.friendsnrc.org/joomdocs/vabs.pdf>. Updated 1984. Accessed March 11, 2011.
92. Hurvitz E, Warschausky S, Berg M, Tsai S. Long-term functional outcome of pediatric stroke survivors. *Top Stroke Rehabil*. 2004;11(2):51-59.
93. The Wechsler Intelligence Scales. <http://www.iupui.edu/~flip/wechsler.html>. Accessed March 11, 2011.
94. Wechsler D. Wechsler Intelligence Scale for Children - Fourth Edition (WISC-IV). <http://www.pearsonassessments.com/HAIWEB/Cultures/en-us/Productdetail.htm?Pid=015-8979-044>. Updated 2003. Accessed March 11, 2011.
